# Supplementary material for: Rapid synthesis of Cu2O hollow spheres at low temperature and their catalytic performance for the decomposition of ammonium perchlorate
Source: Royal Society of Chemistry journal article supplement (doi:10.1039/d1ce00663k), 2021-01-01
Supplement: d1ce00663k1.pdf [file d1ce00663k1.pdf]

## Supporting Information

### Rapid synthesis of Cu<sub>2</sub>O hollow spheres at low temperature and its catalytic performance for the decomposition of ammonium perchlorate

Tao-Tao Lv <sup>a,b</sup>, Huai-Zhong Xing <sup>c</sup>, Hong-Mei Yang <sup>c</sup>, Hui-Xiang Wang <sup>a,\*</sup>, Jing Shi <sup>a</sup>,  
Jing-Pei Cao <sup>a,b,\*</sup>, Bao-Liang Lv <sup>a,b,\*</sup>

<sup>a</sup> State Key Laboratory of Coal Conversion, Institute of Coal Chemistry, Chinese Academy of Sciences, Taiyuan 030001, China

<sup>b</sup> Jiangsu Province Engineering Research Center of Fine Utilization of Carbon Resources, China University of Mining & Technology, Xuzhou 221116, China

<sup>c</sup> Changzhi Comprehensive Inspection and Testing Center, Changzhi 046000, China

\*E-mail: wanghx@sxicc.ac.cn; caojingpei@cumt.edu.cn; lbl604@sxicc.ac.cn

Fax: +86-351-4041153; Tel: +86-351-4063121

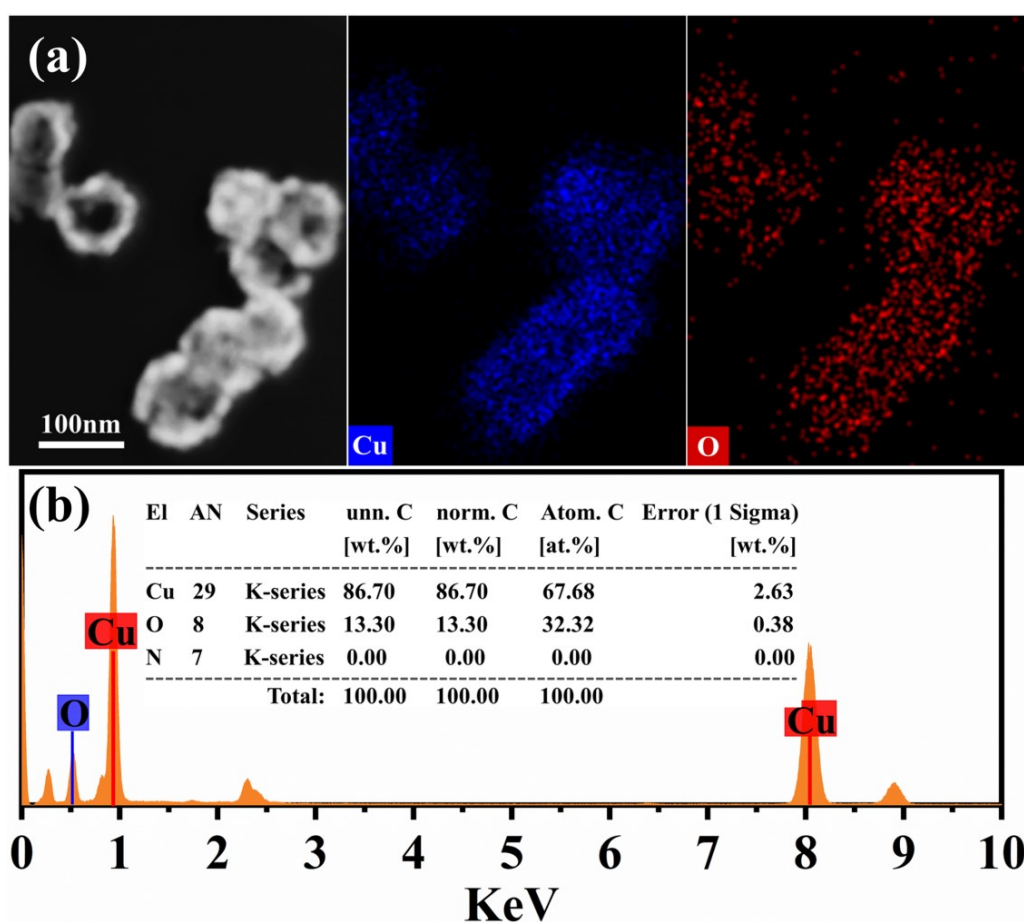

Fig. S1 (a) Element analysis of EDX mapping for Cu<sub>2</sub>O hollow spheres and (b) corresponding EDX point scan.

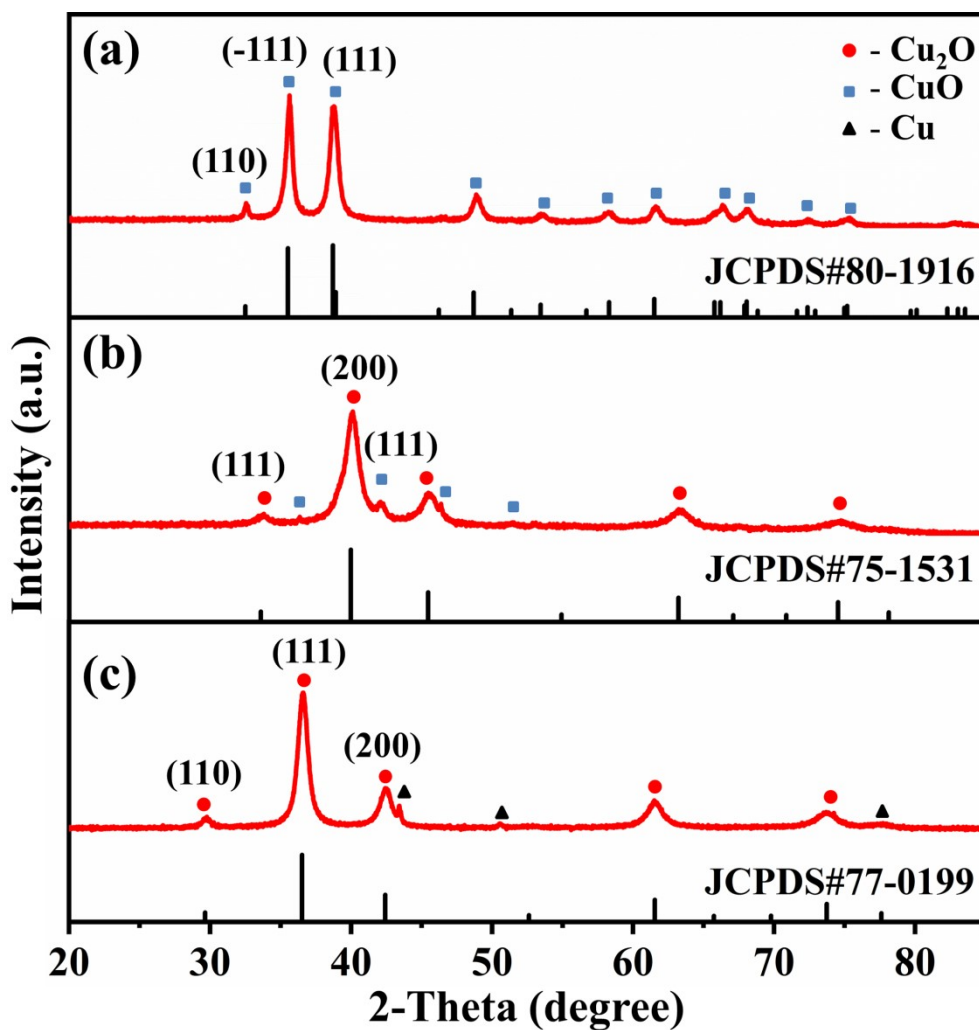

Fig. S2 XRD patterns of products in different reaction stages: (a) reacted for 5 min after addition of NaOH; (b) reacted for 1 min after addition of AA; (c) reacted for 60 min after addition of AA.

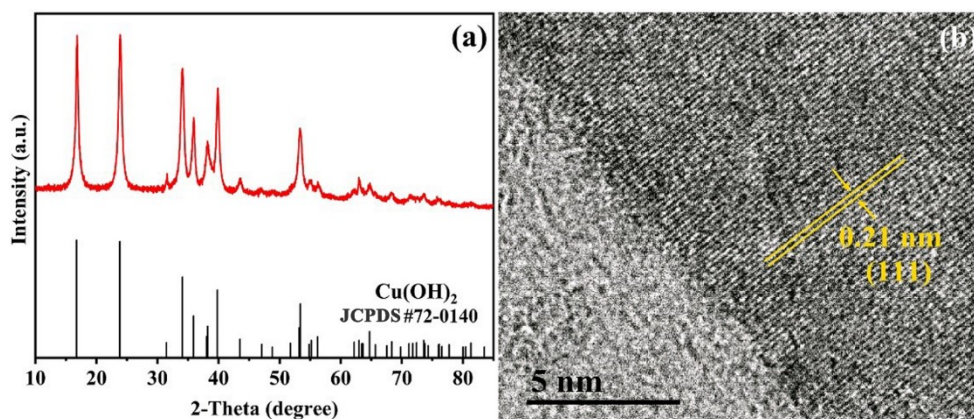

Fig. S3 (a) XRD pattern of product after adding NaOH and (b) HRTEM image of  $\text{CuO}$  nanosheet (after adding NaOH for 5 min).

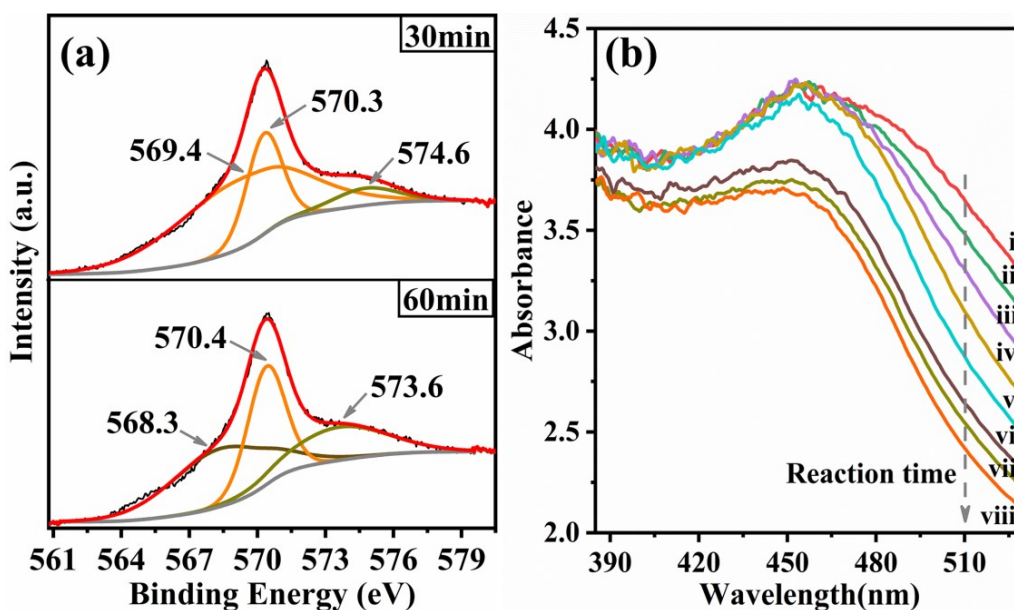

Fig. S4 (a) Peak fitting of the Cu LMM spectrum for the sample measured at 30 and 60 min of reaction; (b) UV-Vis spectra of  $\text{Cu}_2\text{O}$  products under different reaction times: i) 1min, ii) 5 min, iii) 10 min, iv) 20 min, v) 30 min, vi) 40 min, vii) 50 min, viii) 60 min.

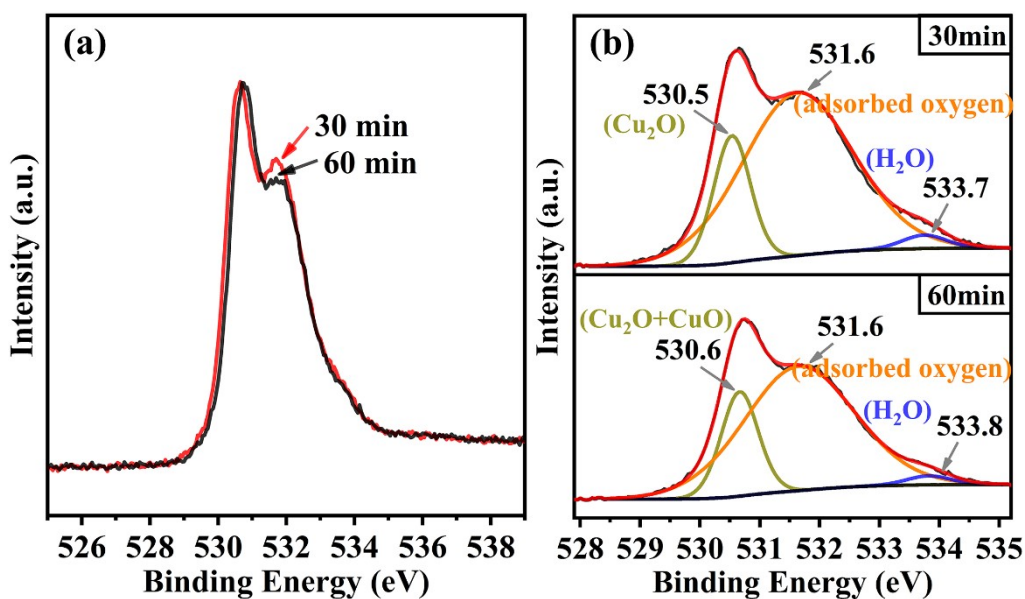

Fig. S5 (a)  $\text{O}1s$  XPS core-level spectra and (b) peak fitting of the  $\text{O}1s$  spectrum for the sample measured at 30 min and 60 min of reaction.

Tab. S1 Comparison of endothermic and exothermic peak areas in the DSC curve.

| Entry         | pure AP |        |        | AP+Cu <sub>2</sub> O nanocages |       |       |
|---------------|---------|--------|--------|--------------------------------|-------|-------|
|               | EndP    | ExoP   |        | EndP                           | ExoP  |       |
| Start(°C)     | 242.2   | 272.3  | 416.4  | 243.2                          | 256.3 | 290.1 |
| End(°C)       | 251.8   | 319.4  | 437.5  | 255.1                          | 282.6 | 321.9 |
| Height(mW/mg) | 0.6498  | 0.3419 | 0.5064 | 0.8517                         | 1.163 | 1.515 |
| Area(J/g)     | 57.37   | 247.6  |        | 63.6                           | 603.1 |       |

EndP: Endothermic peak; ExoP: Exothermic peak.

Tab. S2 Comparison of DSC data of Cu<sub>2</sub>O and other catalysts in AP thermal decomposition.

| Nanocatalyst                     | M (%) | dT/dt °C/min | LTD AP | LTD AP+Cat. | HTD AP | HTD AP+Cat. | Ref. |
|----------------------------------|-------|--------------|--------|-------------|--------|-------------|------|
| CeO <sub>2</sub>                 | 4     | 5            | 301.9  | 289.5       | 428.5  | 378.1       | [1]  |
| α-Fe <sub>2</sub> O <sub>3</sub> | 2     | 10           | 313.2  | 297.5       | 437.4  | 386.8       | [2]  |
| CuO                              | 5     | 10           | 293.4  | 271.5       | 435.2  | 353.8       | [3]  |
| CuO/MoS <sub>2</sub>             | 5     | 10           | 293.4  | 296.8       | 435.2  | 323.5       | [4]  |
| LaMnO <sub>3</sub>               | 5     | 10           | 295.8  | 290.3       | 416.0  | 331.8       | [5]  |
| Cu <sub>2</sub> O                | 2     | 5            | 295.9  | 268.8       | 431.9  | 324.9       | [6]  |

Tab. S3 Comparison of DSC data of Cu<sub>2</sub>O with different morphologies in AP thermal decomposition. M=2%.

| Cu <sub>2</sub> O topography | dT/dt °C/min | LTD AP | LTD AP+Cat.  | HTD AP | HTD AP+Cat.  | Ref.            |
|------------------------------|--------------|--------|--------------|--------|--------------|-----------------|
| 12-pods                      |              |        | 295.7        |        | 343.2        |                 |
| 8-pods                       |              |        | 284.1        |        | 345.1        |                 |
| cube                         |              | 304.5  | 281.0        | 421.8  | 348.2        | [7]             |
| hexapod                      | 3            |        | 280.9        |        | 350.2        |                 |
| cone hole-cube               |              |        | 276.9        |        | 337.8        |                 |
| flower-like                  |              | 297.0  | 274.8        | 410.5  | 343.7        | [8]             |
| octahedron                   | 10           | 298.5  | 296.8        | 420.6  | 356.4        | [9]             |
| tetrahedron                  |              |        | 278.7        |        | 336.7        |                 |
| tetrahedral cage             | 5            | 295.9  | 268.8        | 431.9  | 324.9        | [6]             |
| <b>hollow sphere</b>         |              |        | <b>264.3</b> |        | <b>306.9</b> | <b>Our work</b> |

## References

- 1 J. Shi, H. Wang, Y. Liu, X. Ren, H. Sun and B. Lv, *Inorg. Chem. Front.*, 2019, 6, 1735-1743.

- 2 S. b. Cao, X. G. Han, L. L. Zhang, J. X. Wang, Y. Luo, H. K. Zou and J. F. Chen, *Powder Technol.*, 2019, 353, 444-449.
- 3 Y. Hu, S. Yang, B. Tao, X. Liu, K. Lin, Y. Yang, R. Fan, D. Xia and D. Hao, *Vacuum*, 2019, 159, 105-111.
- 4 Y. Hu, Y. Yang, R. Fan, K. Lin, D. Hao, D. Xia and P. Wang, *Appl. Organomet. Chem.*, 2019, 33, e5060.
- 5 Y. Hu, B. Tao, F. Shang, M. Zhou, D. Hao, R. Fan, D. Xia, Y. Yang, A. Pang and K. Lin, *Appl. Surf. Sci.*, 2020, 513, 145849.
- 6 T.T. Lv, H.X. Wang, X.B. Ren, L.C. Wang, R.M. Ding, J.P. Cao and B.L. Lv, *CrystEngComm*, 2020, 22, 8214-8220.
- 7 X. L. Luo, M. J. Wang, D. S. Yang, J. Yang and Y. S. Chen, *J. Ind. Eng. Chem.*, 2015, 32, 313-318.
- 8 X. L. Luo, M. J. Wang, L. Yun, J. Yang and Y. S. Chen, *J. Phys. Chem. Solids*, 2016, 90, 1-6.
- 9 X. Wang, C. Liu, B. Zheng, Y. Jiang, L. Zhang, Z. Xie and L. Zheng, *J. Mater. Chem. A*, 2013, 1, 282-287.
